# Supplementary material for: Rational design of a selective and sensitive “turn-on” fluorescent probe for monitoring and imaging hydrogen peroxide in living cells
Source: Royal Society of Chemistry journal article supplement (doi:10.1039/d1ra06620j), 2021-01-01
Supplement: d1ra06620j1.pdf [file d1ra06620j1.pdf]

## Supporting Information

### **Rational design of a selective and sensitive “turn-on” fluorescent probe for monitoring and imaging hydrogen peroxide in living cells**

Jing Lu,<sup>a</sup> Liang Ji,<sup>b</sup> and Yanyan Yu<sup>\*,b</sup>

<sup>a</sup> *The First Clinical Medical College, Xuzhou Medical University, 209 Tongshan Road, Xuzhou 221004, Jiangsu, China;*

<sup>b</sup> *Jiangsu Key Laboratory of New Drug Research and Clinical Pharmacy, Xuzhou Medical University, 209 Tongshan Road, Xuzhou 221004, Jiangsu, China.*

\*Corresponding Author:

Email: [yyyxzmc@163.com](mailto:yyyxzmc@163.com); Tel: 86 516 83262138.

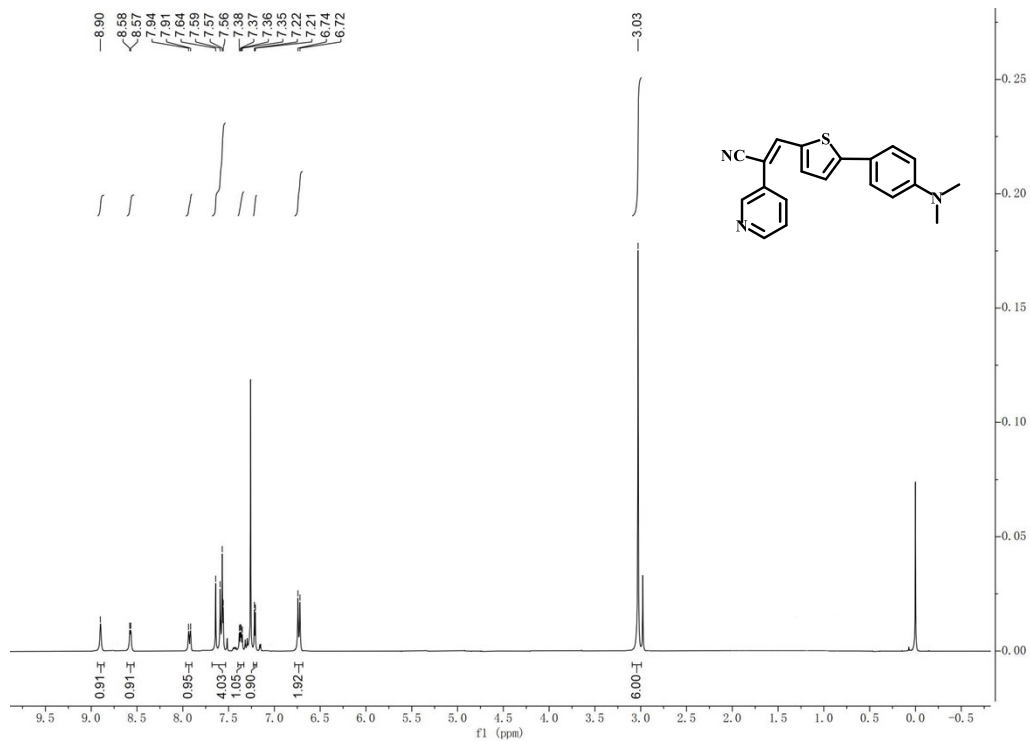

**Figure S1.**  $^1\text{H}$  NMR spectrum of N-Py.

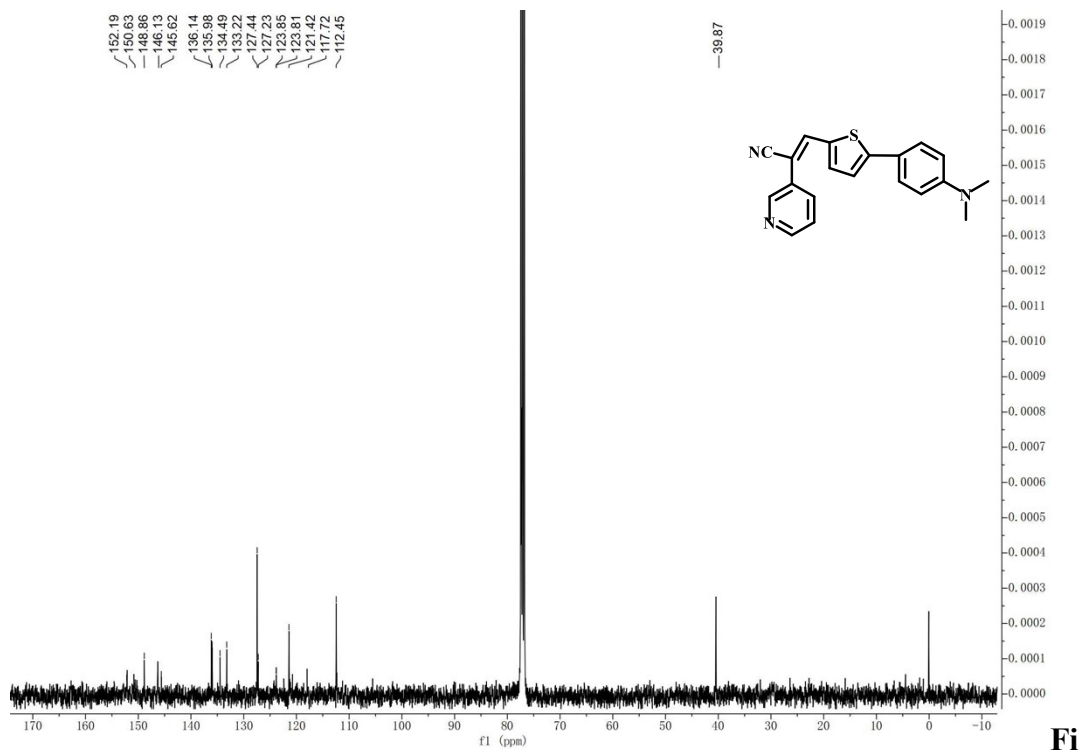

Figure S2.  $^{13}\text{C}$  NMR spectrum of N-Py.

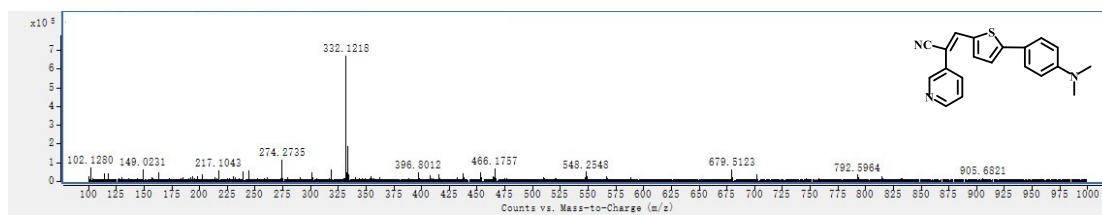

**Figure S3.** HRMS spectrum of N-Py.

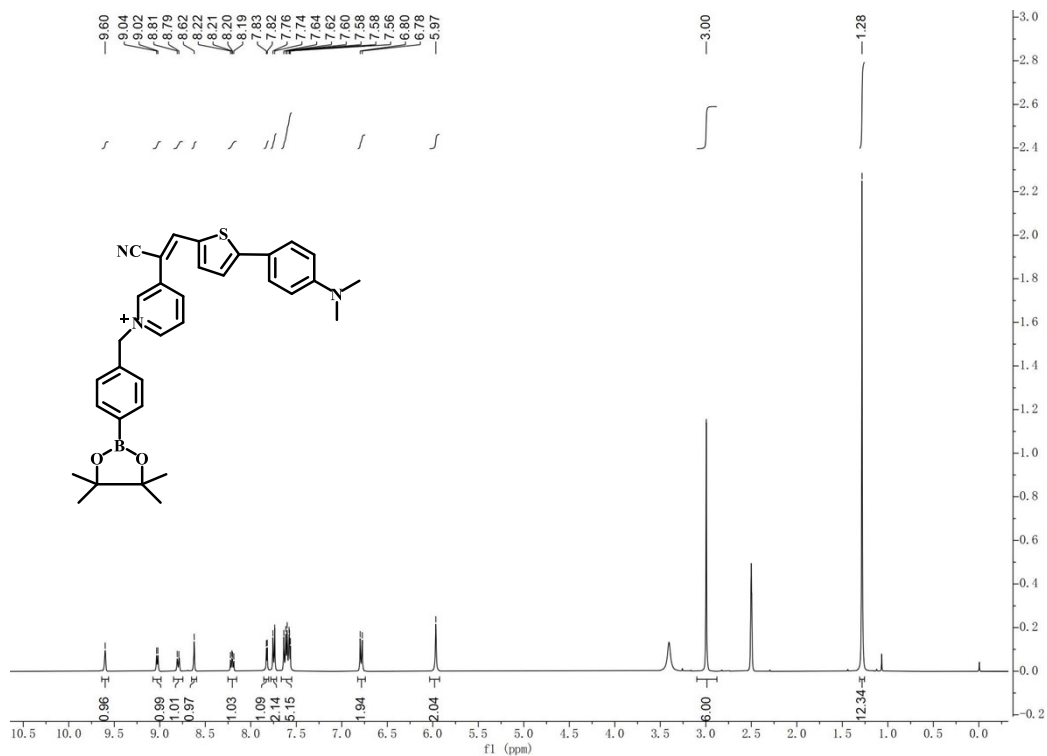

Figure S4. <sup>1</sup>H NMR spectrum of N-Py-BO.

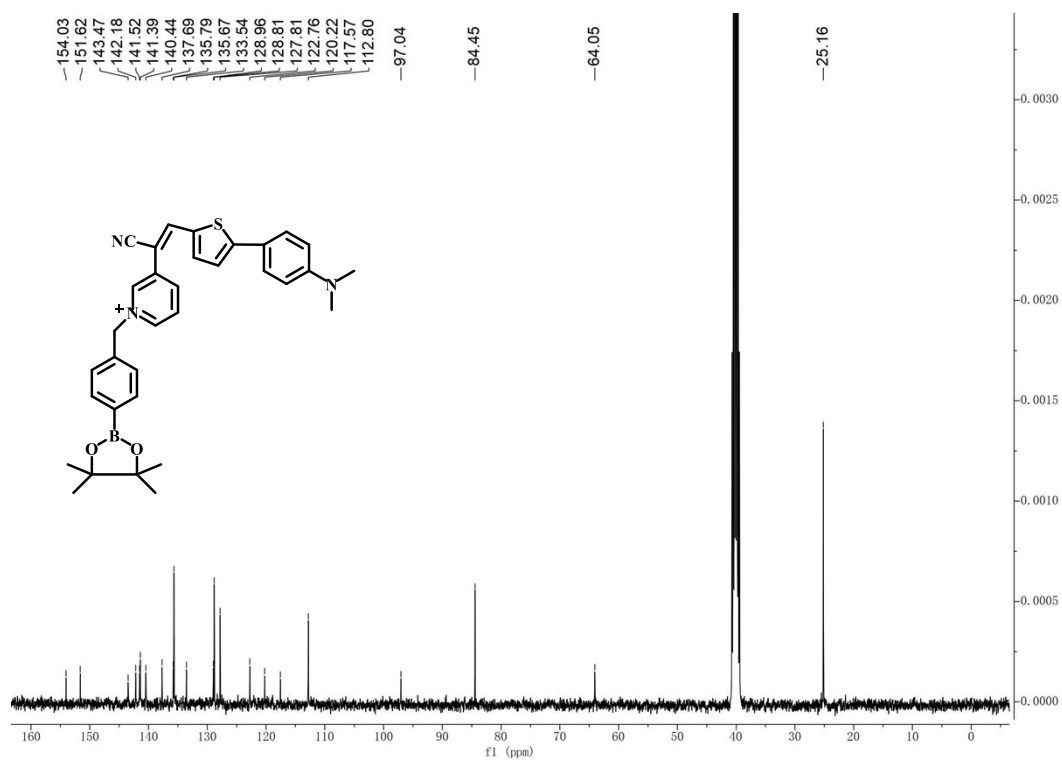

Figure S5. <sup>13</sup>C NMR spectrum of N-Py-BO.

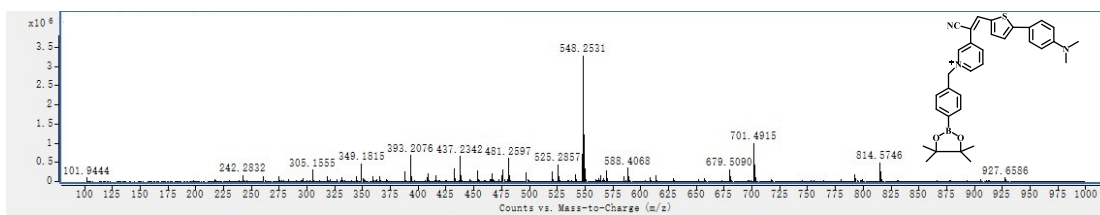

**Figure S6.** HRMS spectrum of N-Py-BO.

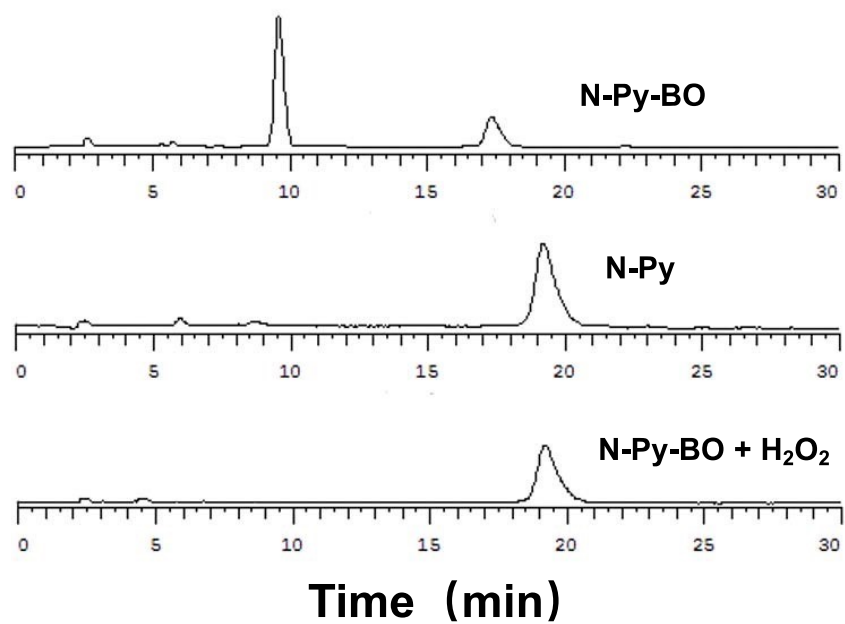

**Figure S7.** HPLC chromatograms of N-Py-BO before and after reaction with H<sub>2</sub>O<sub>2</sub>.  
Mobile phase: Methanol / H<sub>2</sub>O = 75: 25.



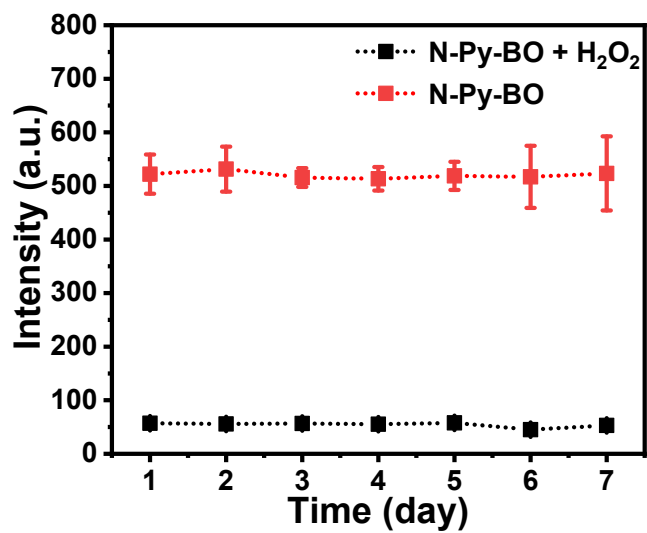

**Figure S8.** The photostability investigation of the N-Py-BO probe (10  $\mu$ M) in the absence and presence of 100  $\mu$ M H<sub>2</sub>O<sub>2</sub>. Emission wavelength: 650 nm.
